# Supplementary material for: VASP Increases Hepatic Fatty Acid Oxidation by Activating AMPK in Mice
Source: PubMed Central journal article supplement — Diabetes. 2013 May 17;62(6):1913–22. doi: 10.2337/db12-0325 (PMC3661609; doi:10.2337/db12-0325), 2013-05-17

SUPPLEMENTARY DATA

**Supplementary Table 1.** Metabolic parameters of *WT* and *Vasp*<sup>-/-</sup> mice received either vehicle or AICAR

|                      | <i>WT</i>   |             | <i>Vasp</i> <sup>-/-</sup> |               |
|----------------------|-------------|-------------|----------------------------|---------------|
|                      | ctl         | AICAR       | ctl                        | AICAR         |
| Body weight (g)      | 27.7 ± 1.6  | 27.0 ± 1.7  | 27.8 ± 1.0                 | 26.7 ± 1.5    |
| Fed glucose (mg/dl)  | 131 ± 10    | 126 ± 9     | 133 ± 13                   | 123 ± 12      |
| Fast glucose (mg/dl) | 85 ± 2      | 81 ± 13     | 63 ± 8 *                   | 58 ± 5        |
| Fed insulin (mg/dl)  | 1.18 ± 0.23 | 1.22 ± 0.18 | 1.24 ± 0.20                | 1.30 ± 0.15   |
| Fast insulin (mg/dl) | 0.82 ± 0.07 | 0.80 ± 0.32 | 1.03 ± 0.11                | 0.94 ± 0.08   |
| NEFA (mEq/l)         | 1.64 ± 0.20 | 1.46 ± 0.30 | 1.60 ± 0.03                | 1.21 ± 0.08 # |

Either PBS (ctl) or AICAR (200mg/kg) was injected (sc) daily for 5 days in 12 weeks old *WT* and *Vasp*<sup>-/-</sup> mice, followed by measurement of metabolic parameters. \*p<0.05 vs *WT* ctl, #P<0.05 vs *Vasp*<sup>-/-</sup> ctl. Data are expressed as means ±SEM (n=5). *WT*; wild type, NEFA; nonesterified fatty acid.

SUPPLEMENTARY DATA

**Supplementary Figure 1.** Involvement of AMPK signaling in the effect of VASP. (A) RT-PCR analysis of fatty acid oxidation genes or *Mtp* gene in AML12 cells with an AMPK inhibitor, compound c (20  $\mu$ M, 4 hours). (n=4) (B) Oleic acid (0.1 mM) was used to treat AML12 cells for 24 hours with or without compound c (20 $\mu$ M, 24 hours). (n=4)

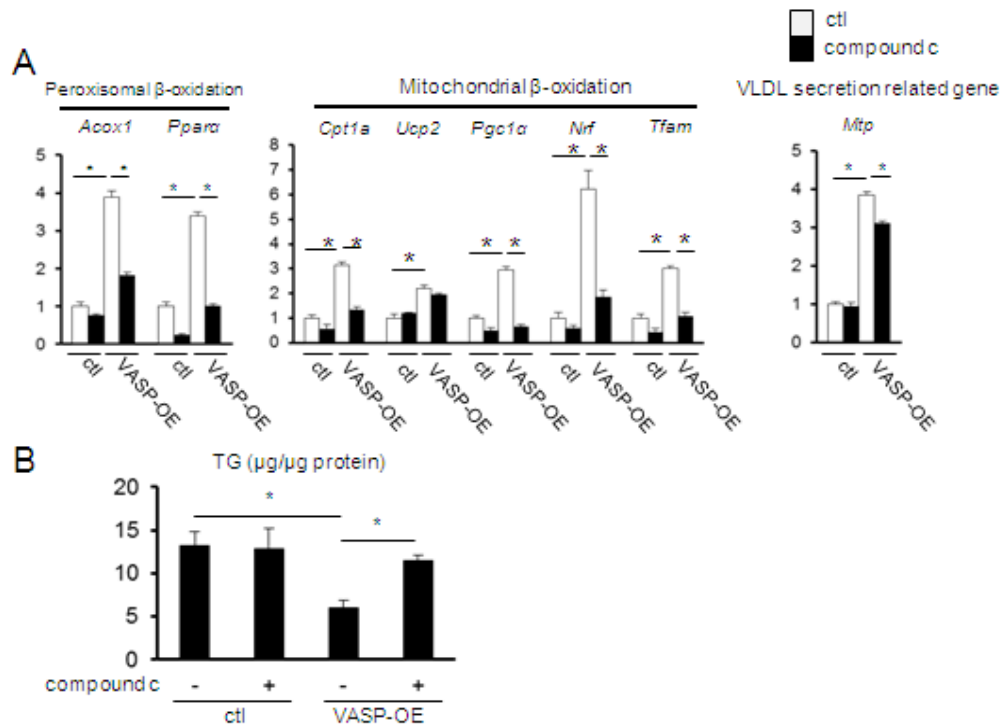

**Supplementary Figure 2.** Restoration of AMPK signaling in *Vasp*<sup>-/-</sup> mice by AICAR Either AICAR (200 mg/kg) or PBS was injected (sc) daily for 5 days in WT and *Vasp*<sup>-/-</sup> mice, followed by sacrifice after an overnight fast. P-AMPK (Thr172) and p-ACC (Ser79) as measured by Western blot. (n=5) \*p<0.05 WT, wild type

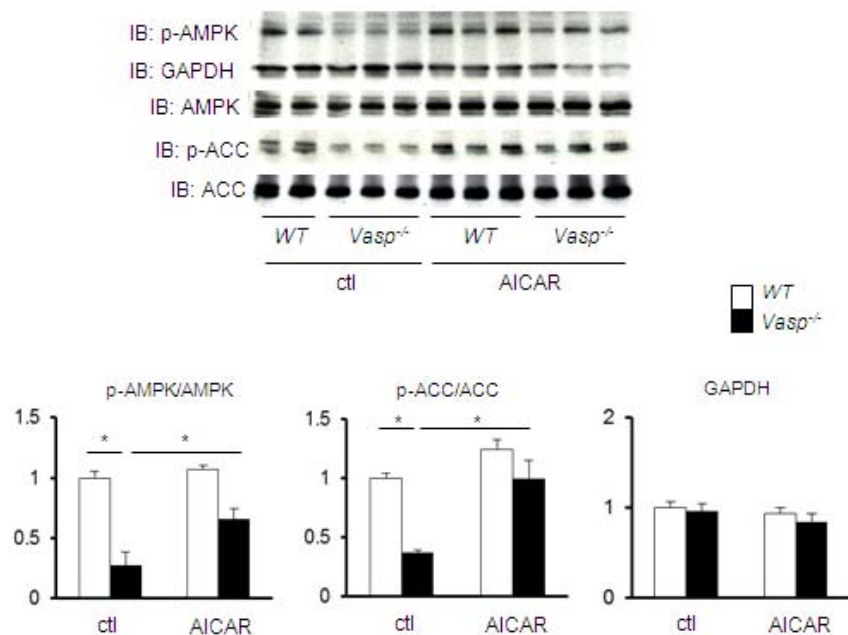

SUPPLEMENTARY DATA

**Supplementary Figure 3.** Effect of 8Br-cGMP on AMPK signaling and fatty acid oxidation. AML12 hepatocytes were stimulated with 8Br-cGMP (100 $\mu$ M) for 4 hours in the presence of siRNAs for AMPK $\alpha$ 1 (*Prkaa1*, 5nM, 48 hours) and  $\alpha$ 2 (*Prkaa2*, 5nM, 48 hours). (A) p-AMPK (Thr172), p-ACC (Ser79), and p-VASP (Ser239) as measured by Western blot. Representative blots are shown (n=3). (B) Rate of [1-<sup>14</sup>C]palmitate incorporation into acid-soluble metabolites (n=4). (C) Relative expression of fatty acid oxidation related genes as measured by RT-PCR (n=4) \*p<0.05

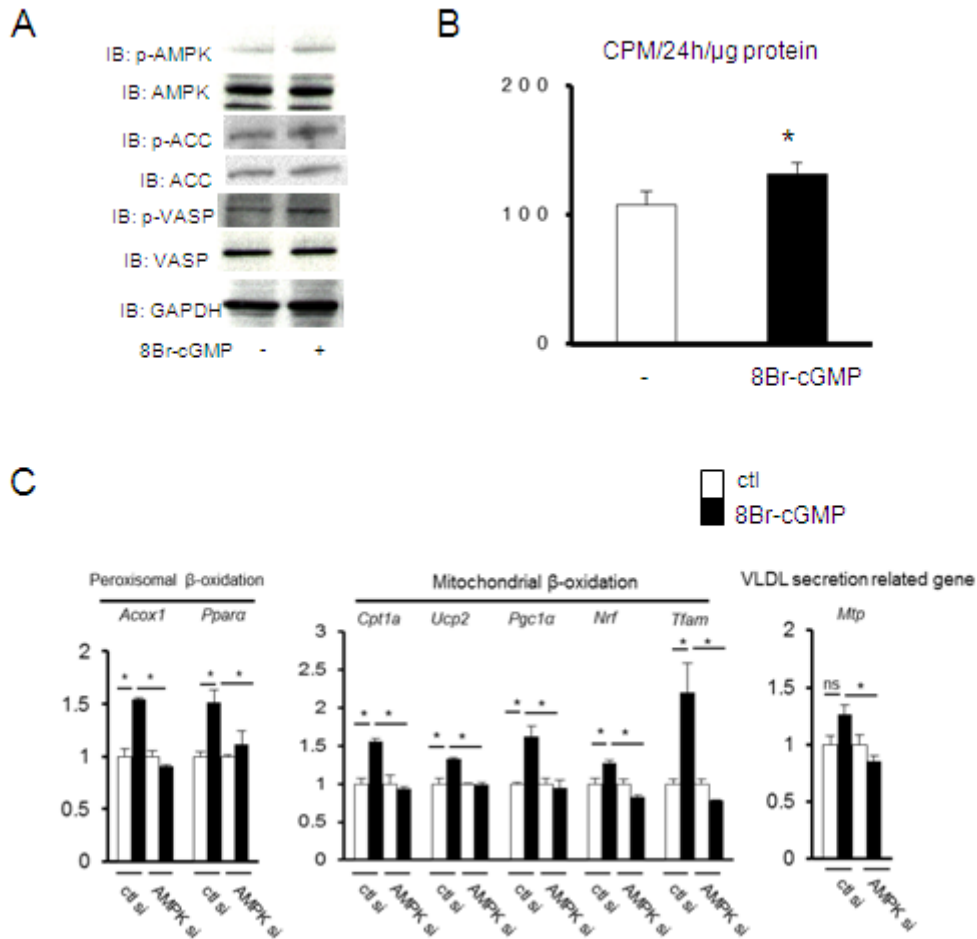

SUPPLEMENTARY DATA

**Supplementary Figure 4.** CaMKK might be involved in the activation of AMPK by VASP in AML12 cells. (A) Phosphorylation of AMPK (Thr172) and ACC (Ser79) by VASP with or without STO-609 (10µg/ml, 4 hours). (B) STO-609 was treated for 4 hours (1µg/ml or 10µg/ml) in either control of VASP overexpressed cells. Relative mRNA expression of fatty acid oxidation related genes and *Mtp* genes as measured by RT-PCR. (n=3)

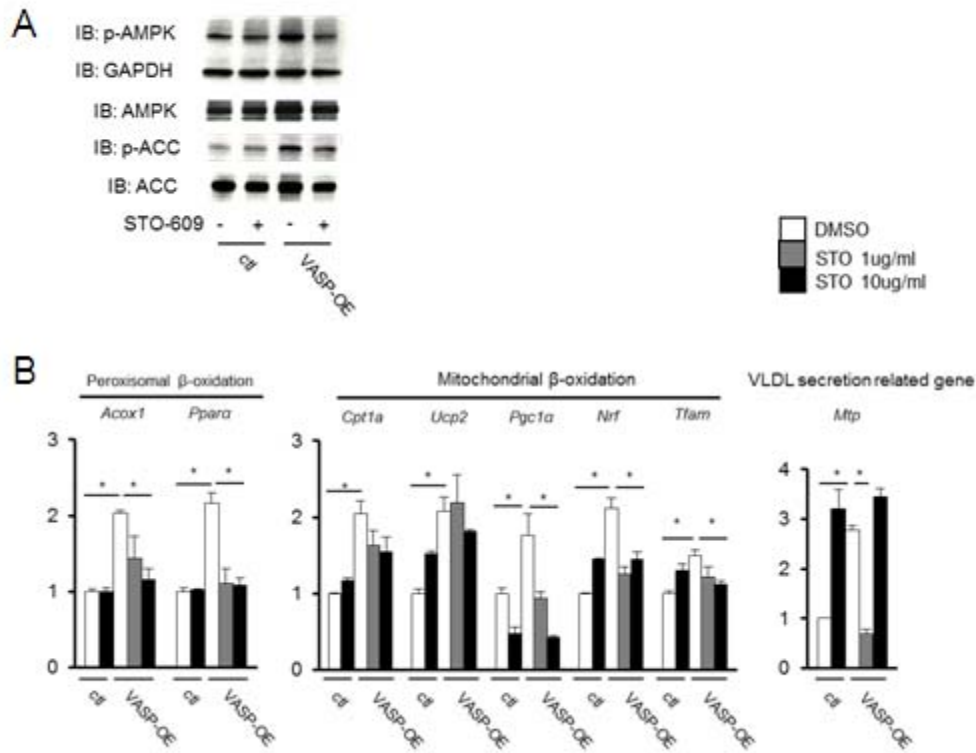

**Supplementary Figure 5.** Alterations of hepatic inflammation by AICAR in *Vasp*<sup>-/-</sup> mice. 12 weeks old *WT* and *Vasp*<sup>-/-</sup> mice fed a chow diet were sacrificed after 16 hours fast. RT-PCR analysis of inflammatory genes in the liver. (n=6) \*p<0.05 *WT*, wild type

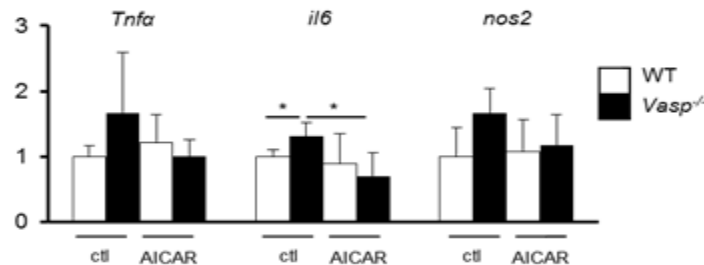

Supplement: supp_db12-0325_DB120325SupplementaryData.pdf [file supp_db12-0325_DB120325SupplementaryData.pdf]
